# Supplementary material
Source: PubMed Central journal article supplement (PMC6125158)
Supplement: NIHMS977462-supplement-3.pdf [file NIHMS977462-supplement-3.pdf]

Supplementary Figure 2.

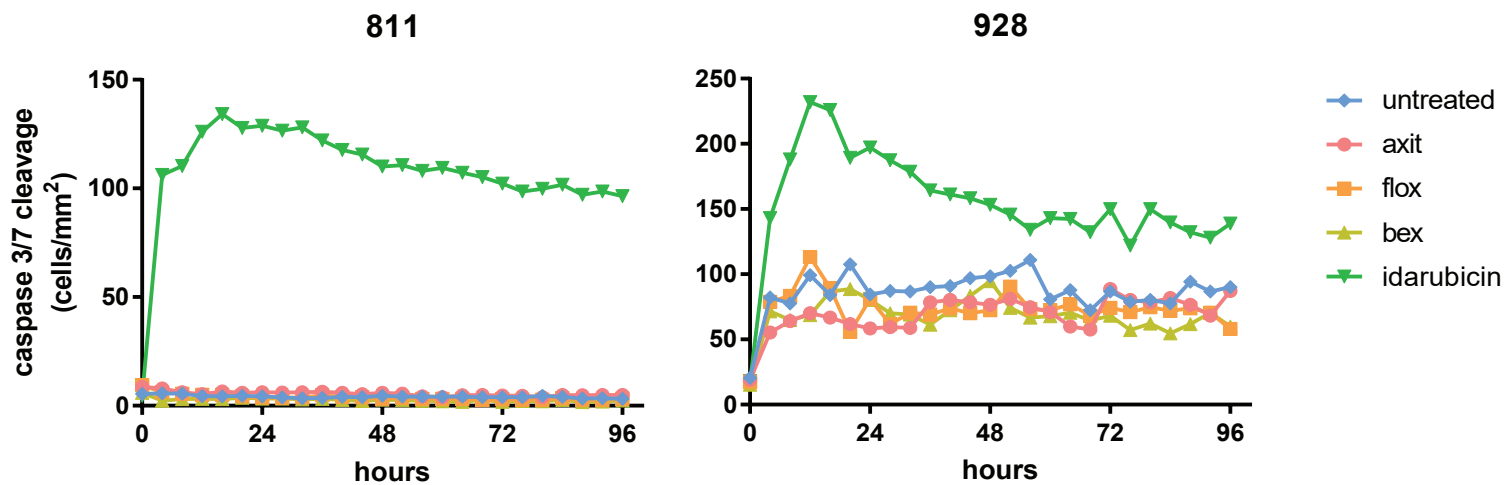

Supplementary Figure 2. Apoptosis time courses for EPN cell lines 811 and 928 treated with floxuridine, bexarotene, and axitinib all at 1 $\mu$ M, as measured by live cell imaging (IncuCyte) of caspase 3/7 activation (green objects/mm<sup>2</sup>). Idarubicin (1 $\mu$ M) provides a positive control for apoptosis and untreated cells serve as a negative control.
